# Supplementary material for: Downstream funding success of early career researchers for resubmitted versus new applications: A matched cohort
Source: PubMed Central journal article supplement (PMC8601543; doi:10.1371/journal.pone.0257559), 2021-11-18
Supplement: pone.0257559.s001.pdf [file pone.0257559.s001.pdf]

27,545 First-time NIH R01 Applicants (2000 to 2014)

Exclusion 1 – Not a true first-time applicant:  
1,366 Applicants with prior funded R01 equivalent or 1<sup>st</sup> application was an amendment

Exclusion 2 – Not a faculty member at a U.S. medical school:  
5,835 No AAMC faculty roster information at the time of 1st R01 application

Exclusion 3 – Missing race/ethnicity or degree:  
478 Degree or race/ethnicity was missing

Exclusion 4 – Not early career faculty:  
4,804 Associate, full professors, and “Other” positions that had tenure

Exclusion 5 – Final exclusionary criteria for statistical inference:  
3,254 First application was funded or did not apply for any NIH funding after initial unfunded application

11,808 Final analytic sample
